# Supplementary material
Source: Springer Nature journal article supplement (https://www.springerprofessional.de/resource/supplementary/13638_2010_17_MOESM2_ESM.pdf/11897214)

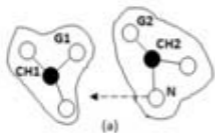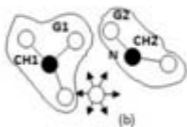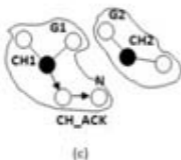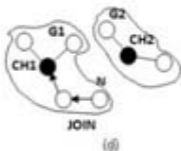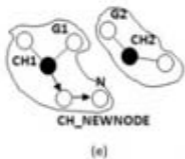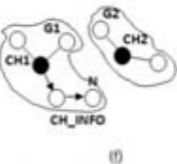

CH1, CH2 - CLUSTER HEAD  
 G1, G2 - GATEWAY NODE  
 N - NODE

Supplement: MOESM2 [file 11897214]
